# Supplementary material
Source: PubMed Central journal article supplement (PMC2766844)

**Supplement Fig. 1.** Nucleotide sequence and deduced amino acid sequence of the cloned rat Mbnl2.

**A.** The locations of the two primers used of cloning are shown. ATG translation start site (TSS) and TAA translation termination site (TTS) are marked with an arrow. Primers used in rat Mbnl2 cloning are indicated. **B.** Deduced 361 amino acid sequence of rat Mbnl2. Peptide sequence (137-157) to generate Mbnl2 antiserum is indicated. **C.** Western blot with Mbnl2 antiserum raised against Mbnl2 internal sequence (137-157). Only one band around 40kDa appeared in the rat pineal gland, retina and Mbnl2 protein expressed in HEK293 cells. For further details, see Materials and Methods section.

# Supp. Fig. 1

A.

GTGCCATCGTATTGAAGTCACTTTTATTAAGGAGGGGGTGATCCACAAAAACCGTCAGGAGACCA  
→ Forward primer  
GAACCCGGGAGCCGGAGATGACAGTGAGTACACATTGCTTGTGGCTCACAGTCTTCCAGCGGG  
GCCTGTGGATCGGTGACTGACTTCTGCTTGTGACACATTTCCCTCCCGGTTTCCGGATTG  
GACTGCATCAAGGAATTCATTACTTACCTTCCAACTTTCATGTTGGAGTTTTCCAGGCAGTAGTTTC  
GAGATCCTTGAGACTTGGATTGATTCATCACTTAACACAAAGGAACCGAGCCCAAAGTAGTTCTC  
ATCATGGCCCTTGAACGTTGCCCCCGTGAGAGACACAAAGTGCGTGACGCTGGAAGTCTGCAGAC  
→ TSS  
AGTACCAAGAGAGGAACGTGCTCACGCTCCGATGAAGAATGCAAATTCGCTCACCCCCAAAAAGT  
TGCCAGGTTGAAAAATGGAAGAGTAATTGCTGCTTTGATTCCCTCAAGGGCCGCTGTTCAAGAGA  
GAACTGCAAATATCTTCATCTTCAACACACTAAAAACTCAGCTAGAAATCAATGGGAGGAACAA  
TTTGATCCAGCAAAAACTGCAGCAGCGATGCTTGCACAGCAGATGCAATTCATGTTTTCCAGGAA  
CACCGCTCCACCCTGTGCCCACTTTTCTGTAGTCCACCATAGGGACAAATGCGGCCATTAGC  
TTTGCTCCTTACTTAGCGCTGTACCCCTGGAGTGGGGTTAGTCCCAACAGAGGTTCTACCCAC  
CACACCTGTCAATTGTTCCGGGAAGTCCGCCGGTCACTGTCCCGGGCTCAACTGCAACTCAGAAAC  
TTCTCAGGACCGATAAACTGAGGTATGCAGGGAGTTCAGCGAGGAAACTGTGCCCGGGGAGA  
GACAGACTGCCGCTTTGCACACCCGGCAGACAGCACCATGATCGACACAAACGACAAACACCGTA  
ACCGTTTTGTATGGATTACATAAAGGGGCGTTGATGAGGGAGAAATGCAAATATTTTACCCTCT  
GCACACTTGCAGGCCAAATCAAAGCTGCGCAGCACCAAGCCAACCAGGCCGCGGTGGCCGCC  
CAGGCAGCCGCCGCCGCCAGTCATGGCTTCCCTCCGGTGCTTTCACCTTTACCAA  
AGAGACAAGCACTTGAAAAAGCAACGGAGCCAGCACGGTCTTCAACCCAGCGCTTGCACACTAC  
CAGCAGGCTTTGACCAAGTCCGAGTTGCAGCAACACACGGCGTTCATTCCACAGATAATTCTGA  
AATAATCAACAGAAATGGAATGGAATGCCAAGAATCTGCATTGAGAATAACTAAACATTGTTACTGT  
ACATACTATCCCCTTTGCTCCTCAATAGAATTGCCAAAACTGCATGCTTAAATTTAGTTCTTCCGGA  
→ TTS  
CAGACCGCAACCCTAAGGCTAGTTCTGCTATGTCATATACGAGTATTAATATGGTATGCTTAGTA  
TATTCAGCCCTAAGATAGTTAACTACCTGAGACCAGCTGCATGTTCAAAGACATACAGGATGAGG  
TTTTCTTTTACAGGGTTCTGAGCGTAGTTTCTGTCCAGGAATATTGCTTATCTCCATAACTATAG  
CCGATGCAGAAAGCCACCCAGTATACACATTTGACTCAGAATACTTCAAATTTAGCAATAAGCA  
GTTAGCTTTAGTTAAGTACCTATTCCAAGGGCAGGTTTGATTCTAATTCCAATCACCACTTTCA  
TTTCTGACTGGATCATAAGGGTATGATTTCACTTCTGAGGAGACGGACACTCGAAGCAGGAGA  
CGGGAAGTGAAGTAAAAACCGCACCTGCCTCGCAGGTCTAAAACTGAGTGGCAGTTCAAGCACA  
GTTGCCGGGGACACATCAAGAGTGTGGGTTTCGCTTTGCCAGGAGAT  
Reverse primer ←

## Supp. Fig. 1

### B.

MALNVAPVRDTKWLTLEVCRQYQRGTCSRSDEECKFAHPPK  
SCQVENGRVIACFDSLKGRCsRENCKYLHPPTHlKTQLEING  
RNNLIQQKTAAMLAQQMQFMFPGTPLHPVPTFPVGPTIGTN  
AAISFAPYLAPVTPGVGLVPTEVLPTTPVIVPGSPPVTVPGSTA  
Peptide Antigen used (137-157)  
TQKLLRTDKLEVCREFRQGNcARGETDCRFaHPADSTMIDTN  
DNTVTVCMDYIKGRcMREKCKYFHPPAHLQAKIKAAQHqAN  
QAAVAAQAAAAAATVMAFPPGALHPLPKRQALEKSNGASTV  
FNPSVLHYQQALtsaQLQHTAFIPTDNSEIINRNGMEcQESA  
LRITKHcyCTYYPLcSSIElPQTAC

Supp. Fig. 1

C.

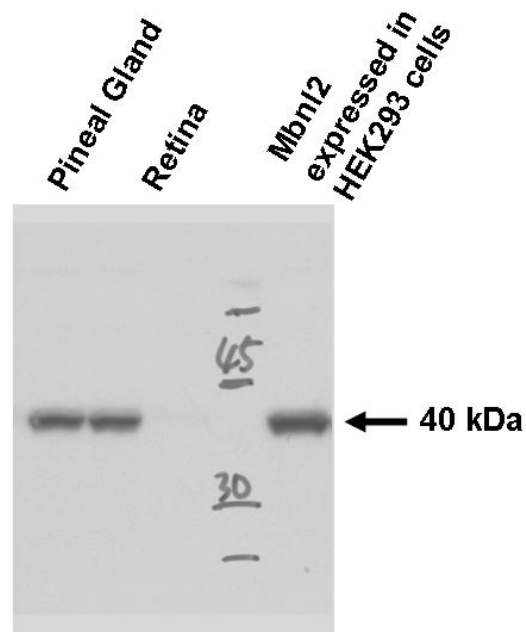

Supplement: NIHMS135429-supplement-Fig_S1.pdf [file NIHMS135429-supplement-Fig_S1.pdf]
